# Supplementary material for: Probiotic potential of bacteria associated with the mangrove epiphytic algae Bostrychia calliptera and Rhizoclonium riparium
Source: PeerJ. 2025 Jun 3;13:e19073. doi: 10.7717/peerj.19073 (PMC12143289; doi:10.7717/peerj.19073)
Supplement: Supplemental Information 1 [file peerj-13-19073-s001.xlsx]

## Sheet: Hoja1
Raw data -Biocontrol testing against fish and shellfish pathogens
Strain	S. aureus				A. hydrophila
	Radius of the inhibition zone (mm)	Average	Radius of the inhibition zone (mm)	Average	Radius of the inhibition zone (mm)	Average	Radius of the inhibition zone (mm)	Average
	28°C		37°C		28°C		37°C
AB01	4	3.5	1	1.5	0	0.5	0	0.7
	4		2		0.5		1
	2.5		1.5		1		1
AB02	5	4.2	3	2.3	0	0	1.5	1.5
	3.5		2.5		0		1
	4		1.5		0		2
AB07	5.5	4.8	1	2	1	0.8	1	0.7
	5		2.5		0.5		0
	4		2.5		1		1
AB08	5.5	5.7	3	4	1	0.7	0.5	0.5
	6		4		0		0
	5.5		5		1		1
AB09	4.5	3.5	1	1.2	1	0.5	1	0.8
	3.5		1		0		1
	2.5		1.5		0.5		0.5
AB17	6.5	6	2.5	3.8	1.5	1.3	1	0.8
	6		4.5		1.5		1
	5.5		4.5		1		0.5
AR20	3	2.3	0	0.7	0	0	0	0
	2		1		0		0
	2		1		0		0
AR28	2	1.3	1.5	1.5	0	0	0	0
	1		1.5		0		0
	1		1.5		0		0
AR29	5	4.3	1	2.3	1	0.5	1	0.8
	4.5		2		0		1
	3.5		4		0.5		0.5
AR31	6.5	4.3	1.5	1.5	0	0	0	0
	3		1.5		0		0
	3.5		1.5		0		0
AR37	6.5	6.3	3	3.5	0	0	0	0
	6.5		4.5		0		0
	6		3		0		0
AN35	6	5.8	3.5	4.3	0	0	0	0
	6.5		6		0		0
	5		3.5		0		0
C+	40	39	31	31.7	34	33.7	33	31.3
	39		32		34		30
	38		32		33		31
