# Supplementary material for: Probiotic potential of bacteria associated with the mangrove epiphytic algae Bostrychia calliptera and Rhizoclonium riparium
Source: PeerJ. 2025 Jun 3;13:e19073. doi: 10.7717/peerj.19073 (PMC12143289; doi:10.7717/peerj.19073)
Supplement: Supplemental Information 2 [file peerj-13-19073-s002.xlsx]

## Sheet: Hoja1
Raw data - Biofilm formation test
Sample	DO (570 nm)	Average	Subtract with white
Blank	0.04	0.044	0
	0.047
	0.046
	0.042
Negative control (E. coli ATCC 11229)	0.047	0.235	0.191
	0.064
	0.049
	0.048
Positive control (P. aeruginosa ATCC 27853)	0.221	0.235	0.191
	0.244
	0.25
	0.226
Bacillus sp. AB08	0.072	0.06	0.016
	0.059
	0.051
	0.056
Bacillus sp. AB17	0.082	0.079	0.035
	0.071
	0.101
	0.063
P. mosselii AR37	0.088	0.082	0.038
	0.067
	0.096
	0.075
Bacillus sp. AN35	0.069	0.072	0.028
	0.046
	0.072
	0.099
Standard deviation of the blank (SD): 0.003
Cut-off value (ODc):
ODc = average OD of blank + (3*SD of blank)
ODc = 0.054
