# Supplementary material for: Probiotic potential of bacteria associated with the mangrove epiphytic algae Bostrychia calliptera and Rhizoclonium riparium
Source: PeerJ. 2025 Jun 3;13:e19073. doi: 10.7717/peerj.19073 (PMC12143289; doi:10.7717/peerj.19073)
Supplement: Supplemental Information 3 [file peerj-13-19073-s003.xlsx]

## Sheet: Hoja1
Raw data - Antibiotic susceptibility test
Strain	Radius of the inhibition zone (mm)
	S	Average	Cip	Average	TE	Average	OT	Average	SAM	Average	C	Average	K	Average	P	Average
Bacillus sp. AB08	6.5	6.3	14.5	14.8	10.5	10.8	8.5	8.7	15	15.3	12.5	12.7	11	10.8	11	11.8
	6		15		11.5		9		15		12		10.5		12.5
	6.5		15		10.5		8.5		16		13.5		11		12
Bacillus sp. AB17	5	5	15	15	10.5	10.2	9	8.8	16	15.5	13.5	13.3	11	10.8	12.5	12.2
	6		15		10		9		15.5		13		11		13
	4		15		10		8.5		15		13.5		10.5		11
P. mosselii AR37	0	0	14	13.3	4	4.5	4.5	4.7	0	0	0	0	9	9	0	0
	0		14		5		5		0		0		9		0
	0		12		4.5		4.5		0		0		9		0
Bacillus sp. AN35	5.5	6.2	15	14.5	10.5	10.5	9	9	15.5	16.2	13	13.3	12	11.7	13	12.7
	8		15.5		11		9		16		13		11		12
	5		13		10		9		17		14		12		13
S: Streptomycin, Cip: Ciprofloxacin, TE: Tetracycline, OT: Oxytetracycline, SAM: Ampicillin, C: Chloramphenicol, K: Kanamycin and P: Penicillin G.
