# Supplementary material for: Probiotic potential of bacteria associated with the mangrove epiphytic algae Bostrychia calliptera and Rhizoclonium riparium
Source: PeerJ. 2025 Jun 3;13:e19073. doi: 10.7717/peerj.19073 (PMC12143289; doi:10.7717/peerj.19073)
Supplement: Supplemental Information 4 [file peerj-13-19073-s004.xlsx]

## Sheet: Hoja1
Raw data - Tolerance testing for temperature
Strain	Count (CFU/mL)
	25°C	Average	28°C	Average	37°C	Average	45°C	Average	50°C	Average	55°C	Average	60°C	Average
Bacillus sp. AB08	15000000	17000000	70000000	50000000	30000000	70000000	150000000	170000000	20000000	20000000	20000000	17000000	0	0
	14000000		40000000		80000000		200000000		20000000		10000000		0
	21000000		40000000		100000000		170000000		20000000		20000000		0
Bacillus sp. AB17	70000000	100000000	90000000	90000000	700000000	470000000	250000000	250000000	60000000	83000000	10000000	10000000	0	0
	110000000		70000000		500000000		250000000		100000000		10000000		0
	120000000		110000000		200000000		240000000		90000000		10000000		0
P. mosselii AR37	300000000	300000000	470000000	380000000	800000000	900000000	0	0	0	0	0	0	0	0
	260000000		350000000		1000000000		0		0		0		0
	340000000		310000000		900000000		0		0		0		0
Bacillus sp. AN35	20000000	22000000	80000000	70000000	110000000	110000000	90000000	100000000	2000000000	2700000000	10000000	10000000	0	0
	23000000		70000000		110000000		100000000		2000000000		10000000		0
	22000000		60000000		110000000		120000000		4000000000		10000000		0
