# Supplementary material for: Probiotic potential of bacteria associated with the mangrove epiphytic algae Bostrychia calliptera and Rhizoclonium riparium
Source: PeerJ. 2025 Jun 3;13:e19073. doi: 10.7717/peerj.19073 (PMC12143289; doi:10.7717/peerj.19073)
Supplement: Supplemental Information 5 [file peerj-13-19073-s005.xlsx]

## Sheet: Hoja1
Raw data - Tolerance testing for pH
Strain	Count (CFU/mL)
	2	Average	3	Average	4	Average	5	Average	6	Average	7	Average	8	Average	9	Average
Bacillus sp. AB08	1100000	970000	1500000	1300000	80000000	73000000	100000000	70000000	140000000	120000000	60000000	90000000	140000000	160000000	90000000	90000000
	900000		900000		60000000		30000000		130000000		130000000		150000000		60000000
	900000		1400000		80000000		80000000		100000000		80000000		190000000		120000000
Bacillus sp. AB17	500000	630000	5000000	3000000	13000000	13000000	130000000	130000000	210000000	190000000	130000000	170000000	170000000	200000000	170000000	160000000
	700000		2000000		14000000		100000000		160000000		190000000		220000000		200000000
	700000		2000000		11000000		160000000		190000000		180000000		210000000		110000000
P. mosselii AR37	0	0	0	0	0	0	50000000	67000000	700000000	970000000	1500000000	1400000000	600000000	970000000	700000000	7.3x108
	0		0		0		80000000		1400000000		1300000000		1500000000		1000000000
	0		0		0		70000000		800000000		1400000000		800000000		500000000
Bacillus sp. AN35	32000000	28000000	2700000	2800000	20000000	19000000	27000000	30000000	200000000	180000000	150000000	150000000	50000000	53000000	100000000	1.3x108
	29000000		2700000		15000000		28000000		240000000		200000000		50000000		180000000
	22000000		3100000		21000000		36000000		90000000		100000000		60000000		100000000
